# Supplementary material for: Systematic analysis of protein turnover in primary cells
Source: PubMed Central journal article supplement (PMC5814408; doi:10.1038/s41467-018-03106-1), 2018-02-15
Supplement: 41467_2018_3106_MOESM3_ESM.pdf [file 41467_2018_3106_MOESM3_ESM.pdf]

## **Description of Additional Supplementary Files**

File Name: Supplementary Data 1

Description: Summary of time points used for dynamic SILAC labelling and raw file names.

File Name: Supplementary Data 2

Description: Protein half-lives from all cell types.

File Name: Supplementary Data 3

Description: Protein half-lives proteasome.

File Name: Supplementary Data 4

Description: Protein half-lives nuclear pore.

File Name: Supplementary Data 5

Description: MaxQuant settings.
